# Supplementary material for: Electrochemical manipulation of adhesion strength of polybenzoxazines on metal surfaces: from strong adhesion to dismantling
Source: Royal Society of Chemistry journal article supplement (doi:10.1039/c4ra03763d), 2014-01-01
Supplement: c4ra03763d1.pdf [file c4ra03763d1.pdf]

## Supplementary Information

# Electrochemical Manipulation of Adhesion Strength of Polybenzoxazines on Metal Surfaces: From Strong Adhering to Dismantling

Cansu Aydogan<sup>1</sup>, Baris Kiskan<sup>1</sup>, Serife O. Hacioglu<sup>2</sup>, Levent Toppare<sup>2,3,4,5</sup>, Yusuf Yagci\*<sup>1,6</sup>

<sup>1</sup>*Istanbul Technical University, Faculty of Science and Letters, Department of Chemistry, 34469, Maslak, Istanbul, Turkey*

<sup>2</sup>*Middle East Technical University, Department of Chemistry, 06800, Ankara, Turkey*

<sup>3</sup>*Department of Biotechnology, Middle East Technical University, 06800 Ankara, Turkey*

<sup>4</sup>*Department of Polymer Science and Technology, Middle East Technical University, 06800 Ankara, Turkey*

<sup>5</sup>*The Center for Solar Energy Research and Application (GUNAM), Middle East Technical University, 06800 Ankara, Turkey*

<sup>6</sup>*Department of Chemistry, Faculty of Science, King Abdulaziz University, Jeddah, Saudi Arabia*

## NMR and FT-IR SPECTRA

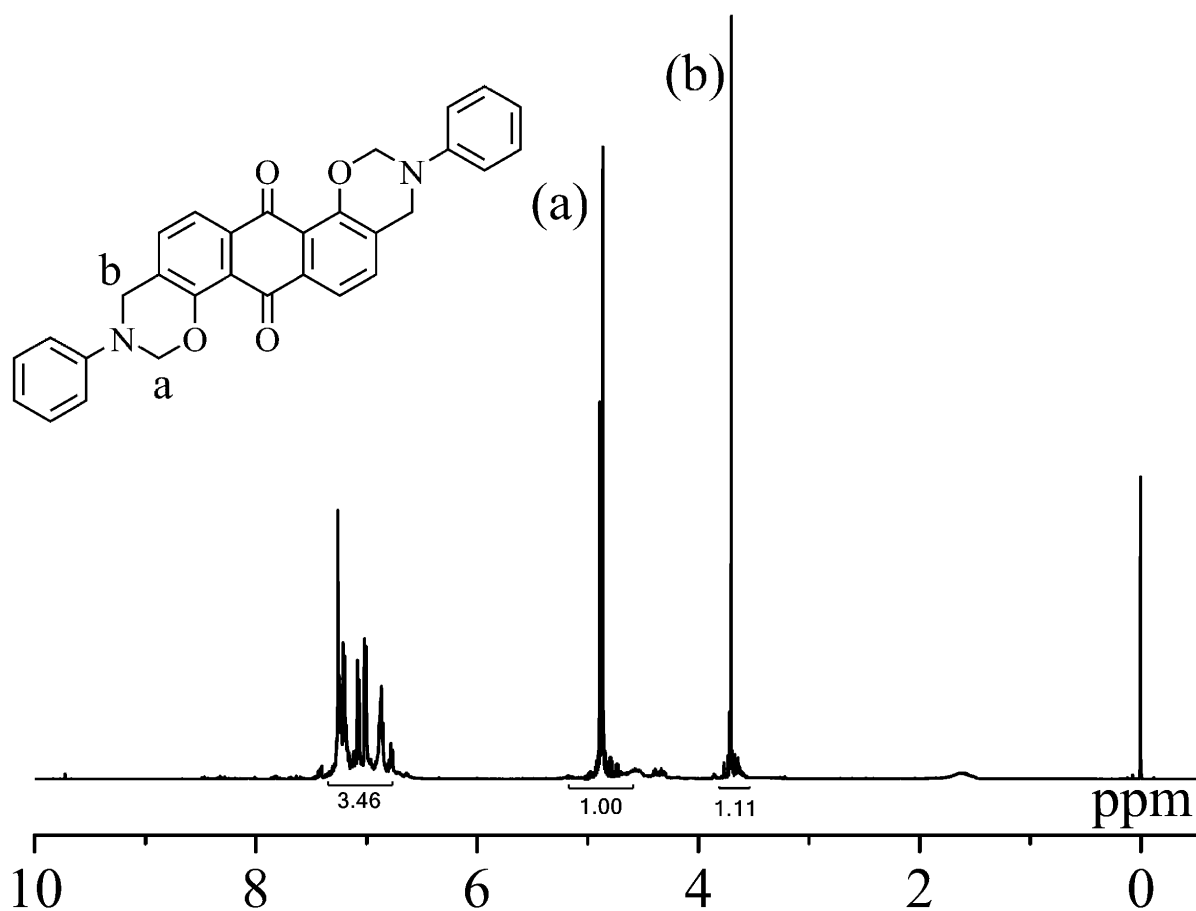

**Figure S1.**  $^1\text{H}$  NMR spectrum of B-Ant-A

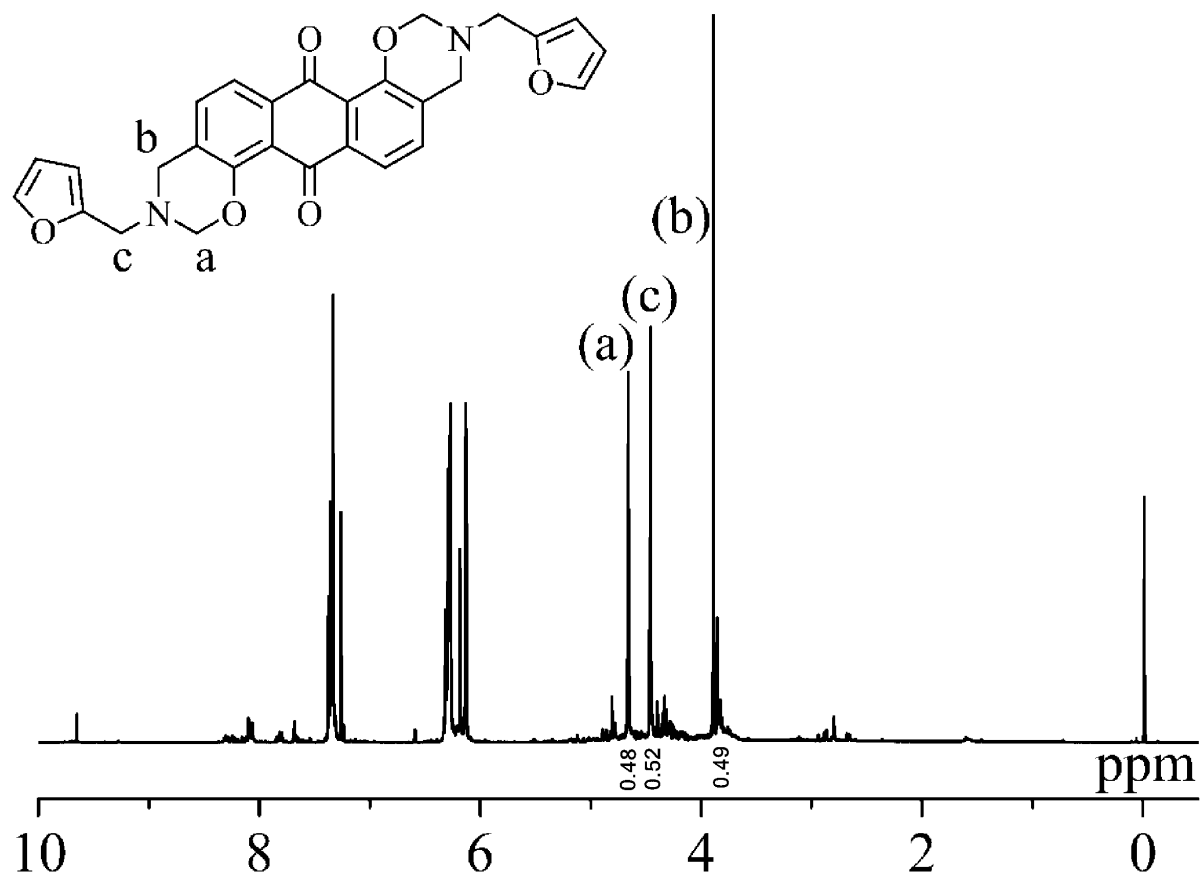

**Figure S2.**  $^1\text{H}$  NMR spectrum of B-Ant-F

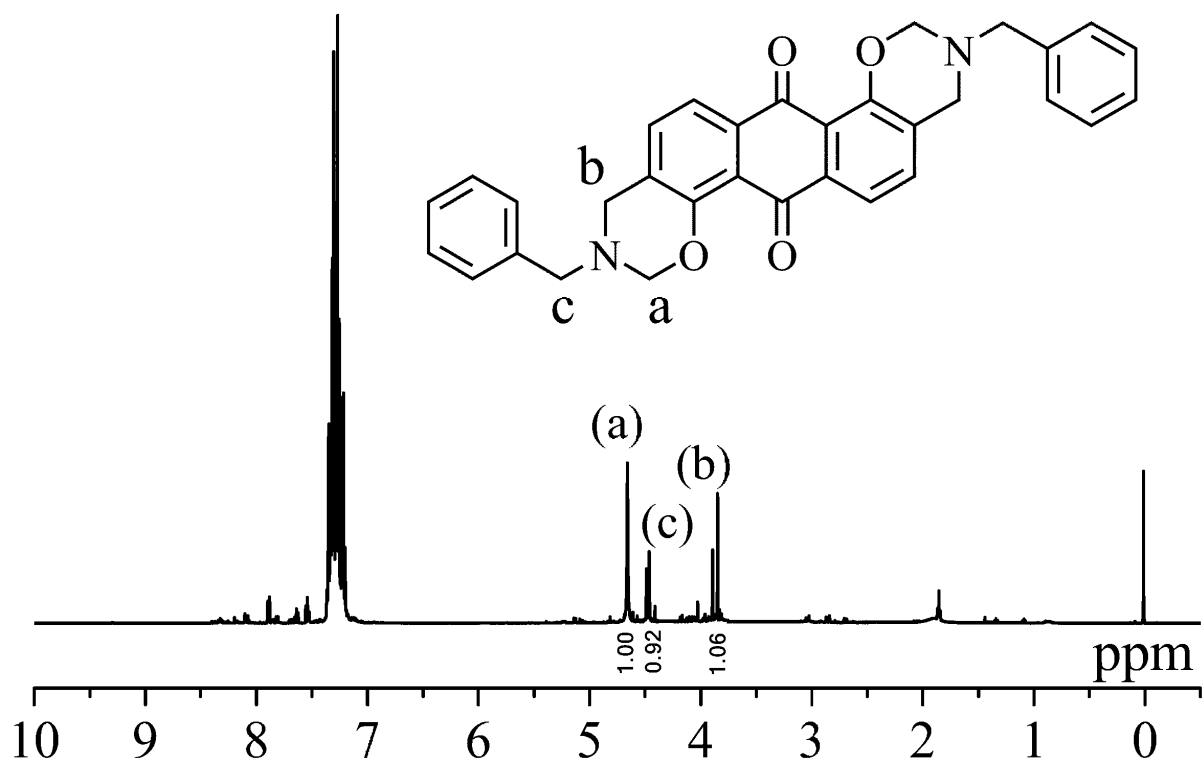

Figure S3. <sup>1</sup>H NMR spectrum of B-Ant-Bn

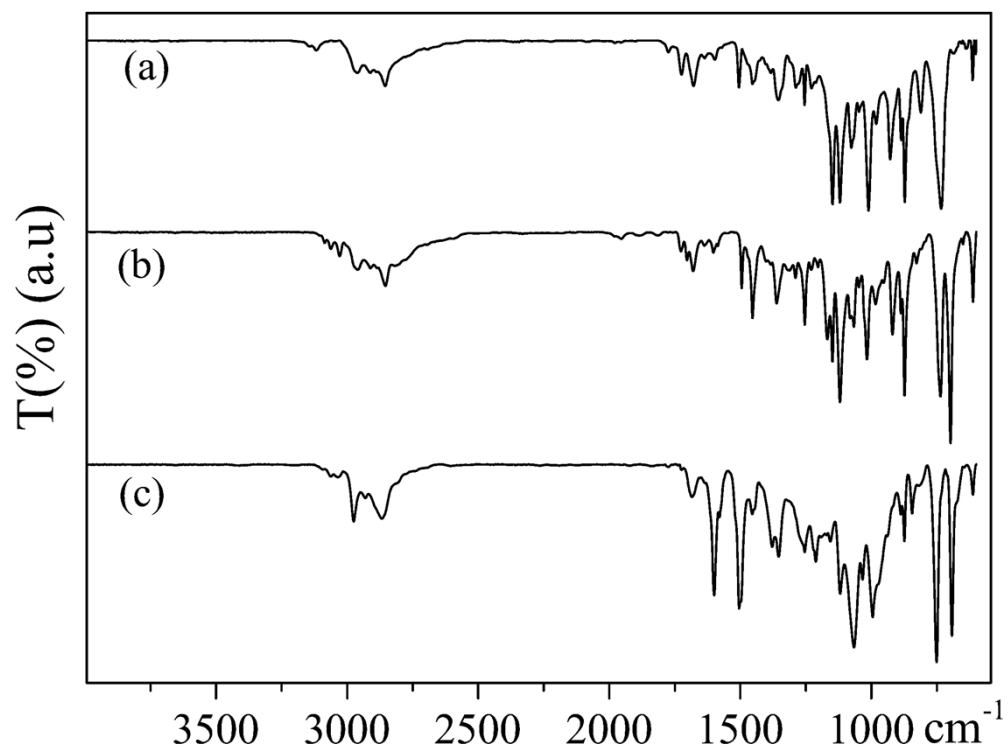

Figure S4. FT-IR spectra of B-Ant-F (a), B-Ant-Bn (b), B-Ant-A (c)

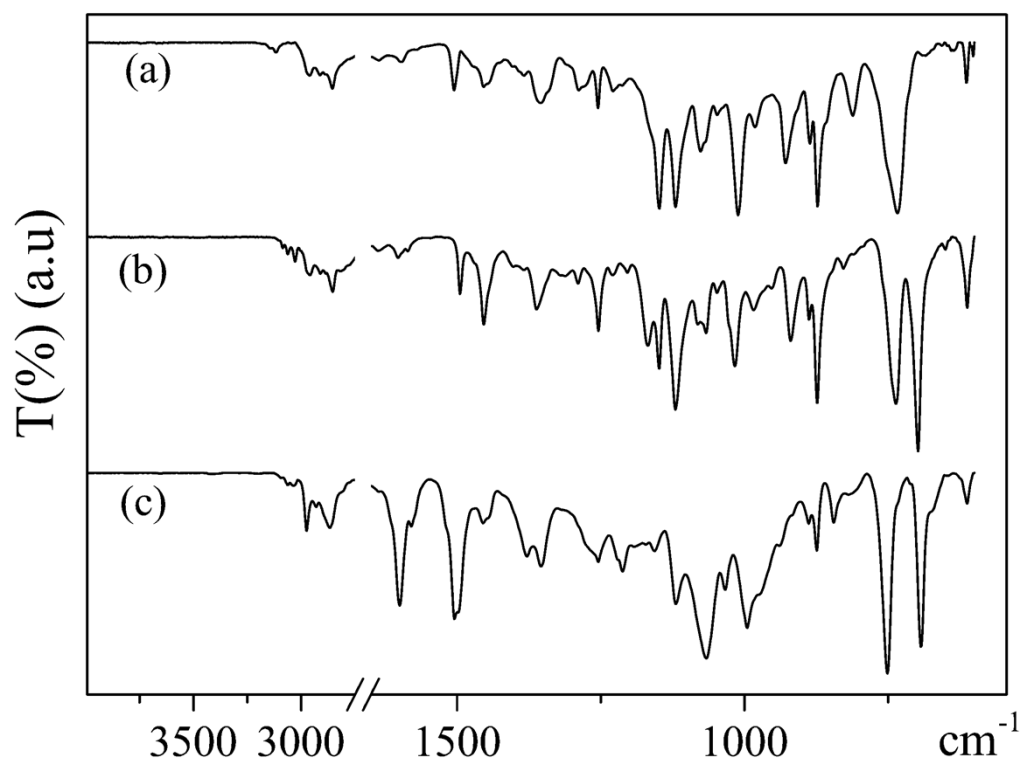

**Figure S5.** FT-IR spectra of B-Ant-F (a), B-Ant-Bn (b), B-Ant-A (c)

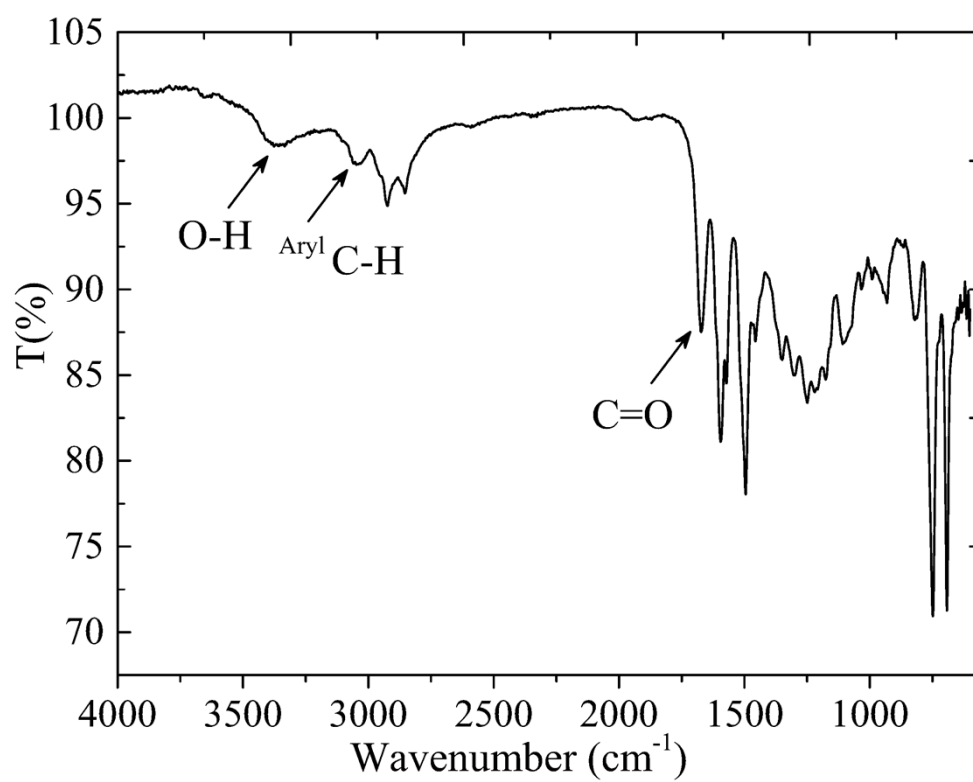

**Figure S6.** FT-IR spectrum of cured B-Ant-A

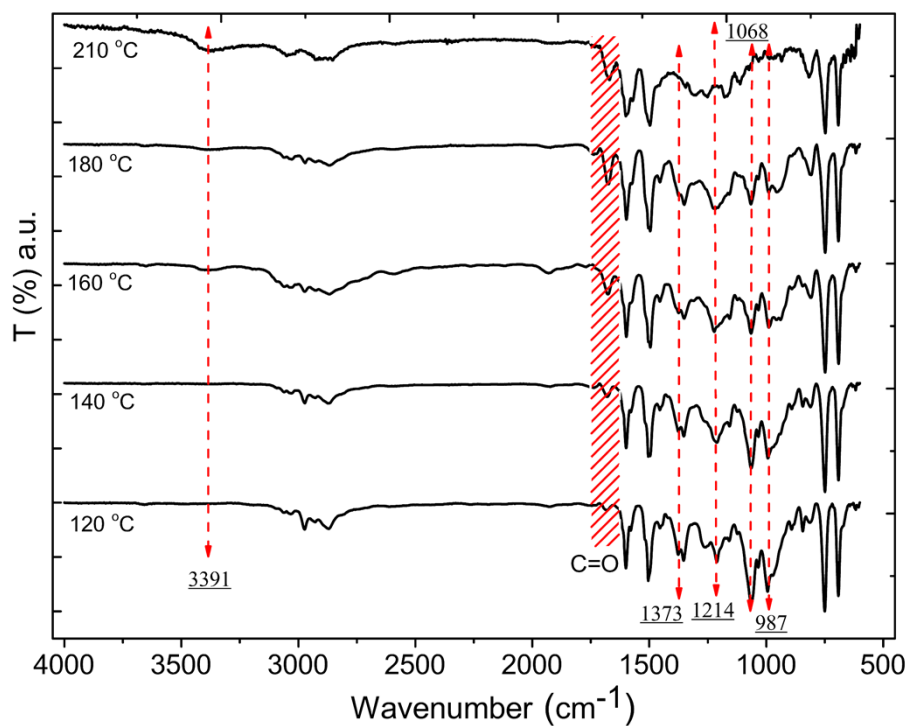

**Figure S7.** FT-IR spectra of B-Ant-A under temperatures varying from 120 to 210 °C

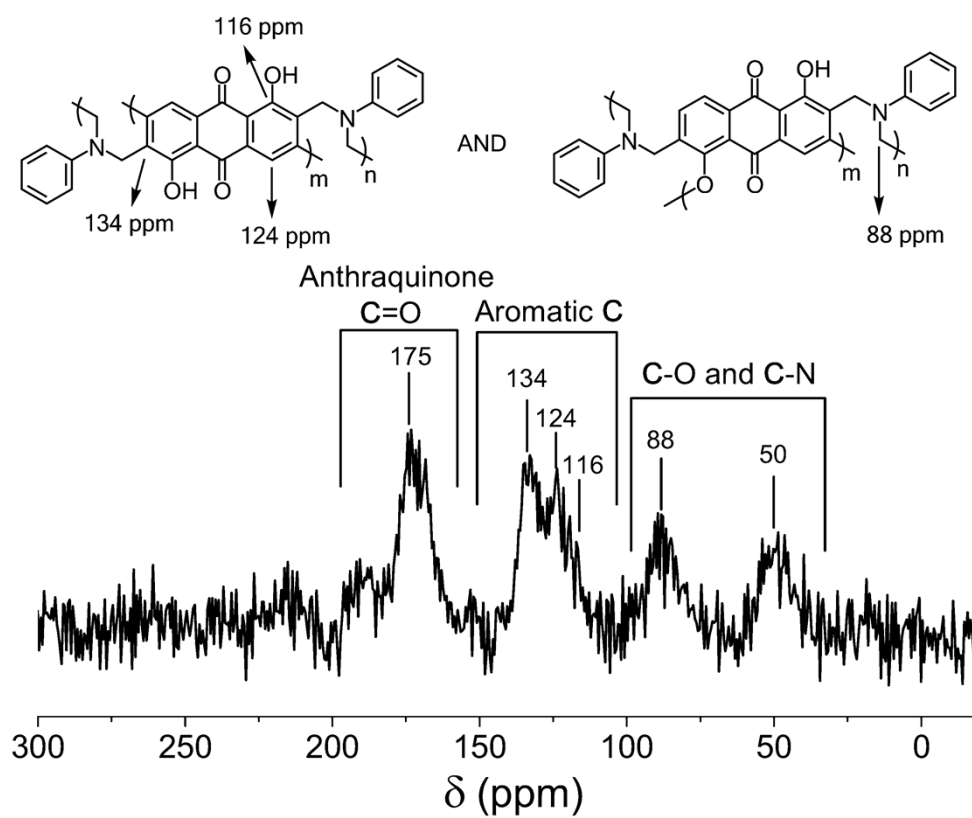

**Figure S8.**  $^{13}\text{C}$  CP-MAS NMR spectrum of PB-Ant-A

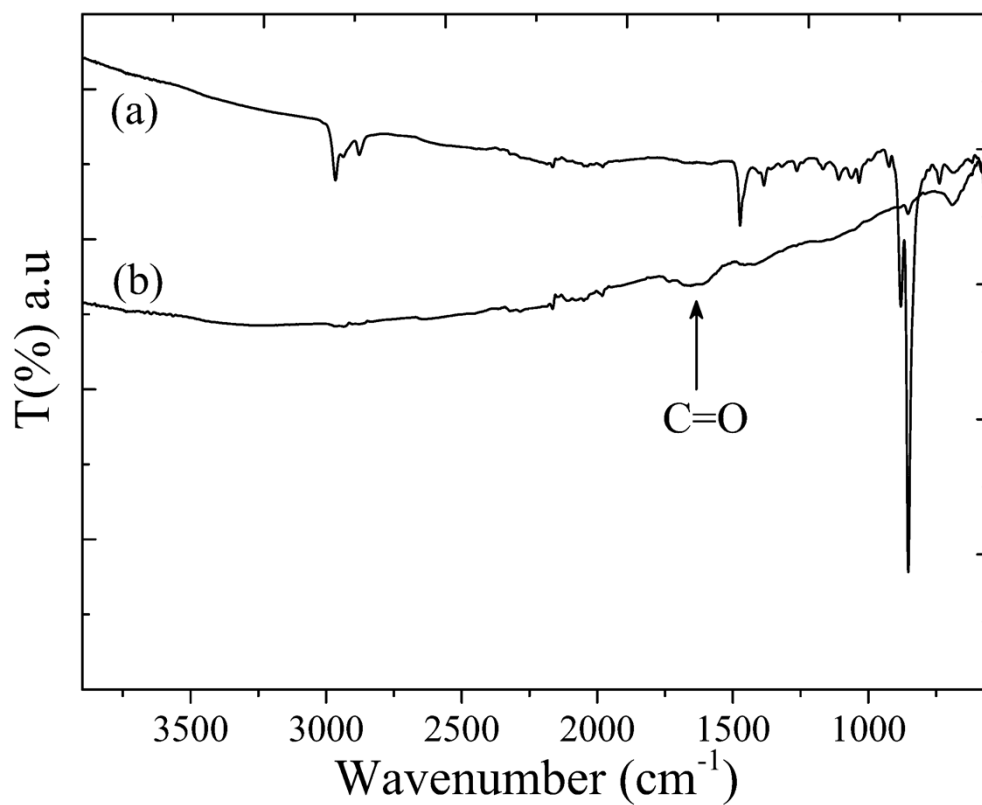

**Figure S9.** FT-IR spectra of electrochemically reduced PB-Ant-A (a) and pristine PB-Ant-A (b)
